# Supplementary material for: Estimation of genetic connectedness diagnostics based on prediction errors without the prediction error variance–covariance matrix
Source: PubMed Central journal article supplement (PMC5439142; doi:10.1186/s12711-017-0302-9), 2017-03-02

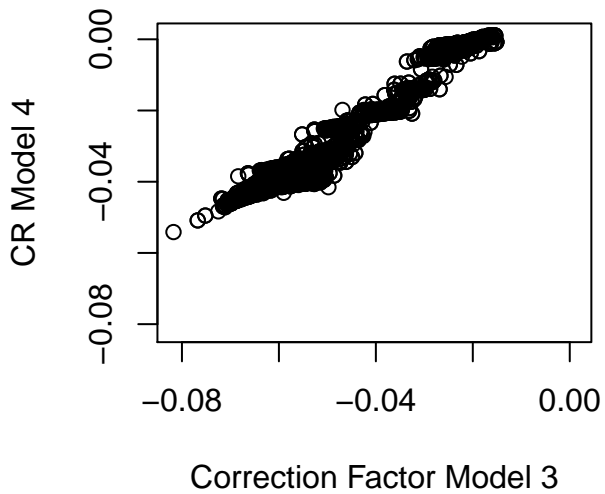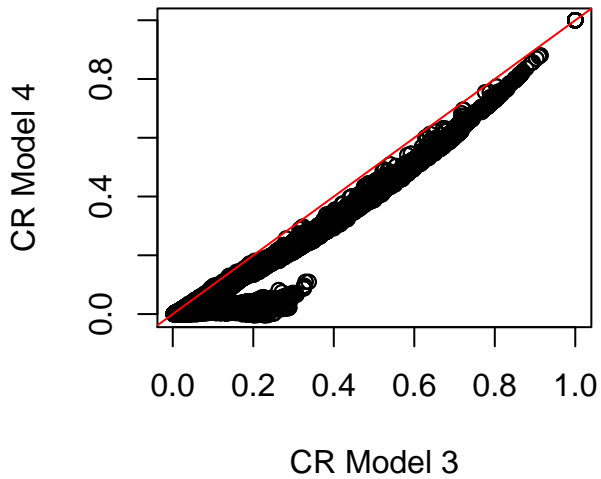

Supplement: 12711_2017_302_MOESM3_ESM.pdf [file 12711_2017_302_MOESM3_ESM.pdf]
